1                    **Longitudinal Study of Leukocyte DNA Methylation and**  
2                    **Biomarkers for Cancer Risk in Older Adults**

3                    Alexandra H. Bartlett<sup>1</sup>, Jane W Liang<sup>1</sup>, Jose Vladimir Sandoval-Sierra<sup>1</sup>, Jay H  
4                    Fowke<sup>1</sup>, Eleanor M Simonsick<sup>2</sup>, Karen C Johnson<sup>1</sup>, Khyobeni Mozhui<sup>1\*</sup>

5                    <sup>1</sup>Department of Preventive Medicine, University of Tennessee Health Science  
6                    Center, Memphis, Tennessee, USA

7                    <sup>2</sup>Intramural Research Program, National Institute on Aging, Baltimore Maryland,  
8                    USA

9                    AHB: [alexhb@gwmail.gwu.edu](mailto:alexhb@gwmail.gwu.edu); JWL: [jane.w.liang@gmail.com](mailto:jane.w.liang@gmail.com); JVSS:  
10                    [jsandov3@uthsc.edu](mailto:jsandov3@uthsc.edu); JHF: [fjay@uthsc.edu](mailto:fjay@uthsc.edu); EMS: [simonsickel@grc.nia.nih.gov](mailto:simonsickel@grc.nia.nih.gov);  
11                    KCJ: [kjohnson@uthsc.edu](mailto:kjohnson@uthsc.edu); KM: [kmozhui@uthsc.edu](mailto:kmozhui@uthsc.edu)

12                    **\*Corresponding author: Khyobeni Mozhui**

13

14

15

16

17

18

## 19 **Abstract**

20 **Background:** Changes in DNA methylation over the course of life may provide  
21 an indicator of risk for cancer. We explored longitudinal changes in CpG  
22 methylation from blood leukocytes, and likelihood of a future cancer diagnosis.

23 **Methods:** Peripheral blood samples were obtained at baseline and at follow-up  
24 visit from 20 participants in the Health, Aging and Body Composition prospective  
25 cohort study. Genome-wide CpG methylation was assayed using the Illumina  
26 Infinium Human MethylationEPIC (HM850K) microarray. **Results:** Global  
27 patterns in DNA methylation from CpG-based analyses showed extensive  
28 changes in cell composition over time in participants who developed cancer. By  
29 visit year 6, the proportion of CD8+ T-cells decreased ( $p$ -value = 0.02), while  
30 granulocytes cell levels increased ( $p$ -value = 0.04) among participants diagnosed  
31 with cancer compared to those who remained cancer-free (cancer-free vs.  
32 cancer-present:  $0.03 \pm 0.02$  vs.  $0.003 \pm 0.005$  for CD8+ T-cells;  $0.52 \pm 0.14$  vs.  
33  $0.66 \pm 0.09$  for granulocytes). Epigenome-wide analysis identified three CpGs  
34 with suggestive  $p$ -values  $\leq 10^{-5}$  for differential methylation between cancer-free  
35 and cancer-present groups, including a CpG located in *MTA3*, a gene linked with  
36 metastasis. At a lenient statistical threshold ( $p$ -value  $\leq 3 \times 10^{-5}$ ), the top 10  
37 cancer-associated CpGs included a site near *RPTOR* that is involved in the  
38 mTOR pathway, and the candidate tumor suppressor genes *REC8*, *KCNQ1*, and  
39 *ZSWIM5*. However, only the CpG in *RPTOR* (cg08129331) was replicated in an  
40 independent data set. Analysis of within-individual change from baseline to Year  
41 6 found significant correlations between the rates of change in methylation in

42 *RPTOR*, *REC8* and *ZSWIM5*, and time to cancer diagnosis. **Conclusion:** The  
43 results show that changes in cellular composition explains much of the cross-  
44 sectional and longitudinal variation in CpG methylation. Additionally, differential  
45 methylation and longitudinal dynamics at specific CpGs could provide powerful  
46 indicators of cancer development and/or progression. In particular, we highlight  
47 CpG methylation in the *RPTOR* gene as a potential biomarker of cancer that  
48 awaits further validation.

49 **Keywords:** Cancer, DNA methylation, biomarker, epigenetics

50

51

52

53

54

55

56

57

58

## 59 **Background**

60 DNA methylation plays a central role in cell differentiation and in defining cellular  
61 phenotypes. Differences in DNA methylation have been associated with a  
62 growing list of morbidities, ranging from metabolic disorders and age-related  
63 decline in health, to developmental and neuropsychiatric conditions. The  
64 standard approach in an epigenome-wide association study (EWAS), which  
65 attempts to link DNA methylation to disease, involves collection of a single  
66 biospecimen from each participant (typically peripheral blood or saliva) and  
67 performing cross-sectional analyses to compare methylation patterns in cases  
68 against matched healthy controls [1, 2]. While differences in CpG methylation  
69 between cases and controls may be directly related to disease, these case-  
70 control differences may also represent DNA sequence variation, differences in  
71 disease treatment, differences in behavior or environment, or differences in  
72 cellular composition [3, 4]. Despite these limitations in the interpretation of DNA  
73 methylation results, such epigenetic markers, if consistent and replicable, could  
74 serve as powerful biomarkers that can be assayed from minimally invasive  
75 tissues such as circulating blood.

76 Cancer is fundamentally due to abnormal cell phenotype and proliferation, and  
77 historically, it was the first disease linked to aberrant DNA methylation [5-7]. The  
78 cancer epigenome often involves global hypomethylation at repetitive elements,  
79 while also potentially involving the hypermethylation at CpGs in the promoter  
80 regions of tumor suppressor genes and other cancer-related genes [8-10]. While

81 abnormal epigenomic changes within tumor cells would hold the most impact,  
82 there is developing evidence that methylation changes relevant to cancer  
83 progression can be detected in circulating blood. For example, global changes in  
84 repetitive elements as well as targeted CpG methylation found in DNA from blood  
85 cells have been reported for multiple cancer types [11-15]. This suggests the  
86 possibility of a pan-cancer biomarker panel detectable in blood that could  
87 precede the clinical detection and diagnosis of cancer [16].

88 Few longitudinal studies have investigated the time-dependent dynamics in DNA  
89 methylation as a potentially important indicator of tumorigenesis [14, 15]. The  
90 present study examines the longitudinal restructuring of the methylome over five  
91 years and evaluates whether change in CpG methylation is a biomarker of  
92 cancer in older adults. Our approach involves dimension reduction techniques  
93 and evaluates leukocyte proportions and differential methylation at the level of  
94 individual CpGs. Overall, our study defined global and targeted changes in the  
95 blood methylome that were correlated to cellular composition, aging, and cancer  
96 in the Health ABC cohort.

## 97 **Methods**

### 98 **Health, Aging and Body Composition Study (Health ABC Study)**

99 The Health ABC Study is a prospective, longitudinal cohort that was recruited in  
100 1997–1998 and consisted of 3,075 older men and women participants aged 70–  
101 79 years at baseline. Participants resided in either the Memphis, TN or  
102 Pittsburgh, PA metropolitan areas, and were either of African American or

103 Caucasian ancestry [17]. Individuals with limited mobility, history of active  
104 treatment for cancer in the past 3 years, or with known life-threatening disease  
105 were excluded. More information on participant screening and recruitment can be  
106 found at the study website [18]. There were annual clinical visits to record health  
107 and function, and subjects were followed for up to 16 years. The study collected  
108 data on adjudicated health events, including cancer, and a biorepository was  
109 developed. All participants provided written informed consent and all sites  
110 received IRB approval. The present study leverages data on a small set of Health  
111 ABC participants who had DNA available from buffy coat collected at baseline  
112 and at follow-up visits (mostly at year 6 from baseline).

### 113 **DNA methylation microarray and data processing**

114 Due to low DNA quality/quantity, 3 participants had DNA from only one visit year,  
115 and in total, we generated DNA methylation data on 37 samples. Participant  
116 characteristics and DNA collection time-points are provided in **Table 1**. Seven of  
117 the 20 participants received adjudicated cancer diagnosis in following years with  
118 four between baseline and Year 6, and three after Year 6.

119 DNA methylation assays were performed, as per the manufacturer's standard  
120 protocol, using the Illumina Infinium Human MethylationEPIC BeadChips  
121 (HM850K) (<http://www.illumina.com/>). For this work, samples were shipped to the  
122 Genomic Services Lab at the HudsonAlpha Institute for Biotechnology  
123 (<http://hudsonalpha.org>). The HM850K arrays come in an 8-samples-per-array  
124 format; prior to hybridization, samples were randomized so that individuals were

125 randomly distributed across the arrays. Raw intensity data (idat files) were  
126 loaded to the R package, minfi (version 1.22) [19]. Methylation level at each CpG  
127 was estimated by the  $\beta$ -value, which is the ratio of fluorescent intensities  
128 between the methylated probe and unmethylated probe. For quality checks (QC),  
129 we compared the log median intensities between the methylated (M) and  
130 unmethylated (U) channels using the “plotQC” function and examined the density  
131 plots for the  $\beta$ -values (QC plots are provided in **Additional file 1: Figure S1**). All  
132 37 samples passed the initial QC (**Additional file 1: Figure S1A**). Participant  
133 sex, as determined by DNA methylation, matched the sex listed in the participant  
134 record.

135 Methylation data was quantile-normalized using the minfi “preprocessQuantile”  
136 function. To evaluate sample clustering, we performed hierarchical cluster  
137 analysis and principal component analysis (PCA) using the full set of 866,836  
138 probes (**Additional file 1: Figure S1B**). Sex was a strong source of variance  
139 when the full set of probes was used. We therefore filtered out 19,681 probes  
140 that targeted CpGs on the sex chromosomes. An additional 2,558 probes were  
141 filtered out due to detection p-values  $> 0.01$  in 3 or more samples. Finally, we  
142 excluded 104,949 probes that have been flagged as unreliable due to poor  
143 mapping quality or overlap with genetic sequence variants (MASK.general list of  
144 probes from [20]). This resulted in 739,648 probes that were considered for  
145 downstream analyses. The updated PC plot showed no clustering by sex or by  
146 the Illumina Sentrix ID, which indicated that there was no strong chip effect.  
147 However, there were two outlier samples from the same individual (Per13)

148 **(Additional file 1: Figures S1B, S1C)**. Since the two samples were assayed on  
 149 different Sentrix arrays, the outlier status is unlikely to be the result of technical  
 150 artifact, but rather, flags Per13 as a biological outlier (excluded from downstream  
 151 analyses). As an additional error checking step to confirm if samples from the  
 152 same participants paired appropriately with self, we repeated the unsupervised  
 153 cluster analysis using only 52,033 probes that were filtered out from the main set  
 154 of probes due to overlap with common single nucleotide polymorphism (SNP) in  
 155 the dbSNP database **(Additional file 2: Figures S2)**.

156 **Table 1. Characteristics of participants**

| ID    | Ancestry <sup>1</sup> | Sex <sup>1</sup> | Age <sup>1</sup> | Followup<br>Year <sup>2</sup> | Cancer <sup>3</sup> | Time <sup>4</sup> |
|-------|-----------------------|------------------|------------------|-------------------------------|---------------------|-------------------|
| Per1  | EA                    | Male             | 75               | 6                             | no                  |                   |
| Per2  | AA                    | Male             | 71               | 6                             | yes <sup>p</sup>    | 7                 |
| Per3  | AA                    | Female           | 72               | 6                             | no                  |                   |
| Per4  | EA                    | Male             | 74               | 6                             | yes <sup>c</sup>    | 5                 |
| Per5  | EA                    | Female           | 76               | 6                             | no                  |                   |
| Per6  | EA                    | Male             | 75               | 6                             | yes <sup>p</sup>    | 4                 |
| Per7  | AA                    | Male             | 76               | 2                             | no                  |                   |
| Per8  | AA                    | Female           | 78               | 6                             | no                  |                   |
| Per9  | EA                    | Female           | 78               | 6                             | yes <sup>b</sup>    | 1                 |
| Per10 | AA                    | Male             | 74               | 6                             | yes <sup>o</sup>    | 10                |
| Per11 | AA                    | Female           | 74               | 6                             | no                  |                   |
| Per12 | AA                    | Female           | 71               | 6                             | no                  |                   |
| Per13 | EA                    | Male             | 76               | 6                             | yes <sup>l</sup>    | 0.5               |
| Per14 | EA                    | Male             | 75               | na                            | no                  |                   |
| Per15 | EA                    | Female           | 73               | 6                             | no                  |                   |
| Per16 | EA                    | Male             | 73               | 6                             | no                  |                   |
| Per17 | AA                    | Female           | 76               | na                            | no                  |                   |
| Per18 | AA                    | Female           | 78               | 6                             | yes <sup>s</sup>    | 11                |
| Per19 | AA                    | Female           | 72               | 6 (no<br>baseline<br>DNA)     | no                  |                   |
| Per20 | EA                    | Female           | 70               | 6                             | no                  |                   |

157 <sup>1</sup>Self-reported race, sex, and age at baseline; EA = European Americans or Caucasians and AA  
 158 = African Americans



159 <sup>2</sup>Year from baseline when second DNA sample was collected; two participants had no follow-up  
160 DNA and one participant had no baseline (visit year 1) DNA due to low DNA quality/quantity.  
161 <sup>3</sup>Cancer diagnosis during following years; all participants were considered free of diagnosed  
162 cancer at time of screening and recruitment; p = prostate, c = colon; b = breast; l = leukemia; s =  
163 stomach; o = other  
164 <sup>4</sup>Time from baseline to cancer diagnosis in years  
165

## 166 **Estimating cellular composition**

167 Cellular heterogeneity has a strong influence on DNA methylation, and methods  
168 have already been developed to estimate cellular composition of whole blood  
169 from genome-wide DNA methylation data [21-23]. We used the  
170 “estimateCellCounts” function in minfi, which implements a modified version of  
171 the algorithm by Houseman et al. [23] and relies on a panel of cell-type specific  
172 CpGs to serve as proxies for different types of white blood cells.

## 173 **Analyses of DNA methylation data**

174 Considering the small sample size of the genome-wide data, we first started with  
175 a dimension reduction approach and applied PCA to capture the major sources  
176 of global variance in the methylome. The top 5 principal components (PCs) were  
177 then related to baseline variables using chi-squared tests for categorical  
178 variables (sex and race), and analysis of variance for continuous variables (BMI  
179 and age). We also examined the time-dependent change in the PCs with visit  
180 year as the predictor variable. Correlations between leukocyte types and the PCs  
181 were examined using bivariate analysis. We considered adjudicated cancer  
182 diagnosis as the main outcome variable and examined whether methylome-

183 based variables differed between those who developed cancer and those who  
184 remained cancer-free.

185 Our primary analysis was to evaluate differential methylation at the CpG-level. As  
186 in Roos et al. [16], we first fitted a linear regression model on each probe for the  
187 first 5 PCs ( $\beta$ -value  $\sim$  PC1 + PC2 + PC3 + PC4 + PC5) to adjust for the effects of  
188 confounding variables such as cellular heterogeneity and additional unknown  
189 sources of variance. The adjusted  $\beta$ -values were then used to examine  
190 differential methylation between cancer-free and cancer-present groups using t-  
191 tests. The t-tests were done with data only from visit Year 6. To evaluate the  
192 reliability of identified cancer-associated CpGs, we acquired the full results from  
193 Roos et al. [16], and compared the p-values and the direction of effect (i.e.,  
194 increases or decreases in methylation in the cancer group relative to cancer-free  
195 group). To evaluate longitudinal trajectory, we considered only the top 10 CpGs  
196 associated with cancer and calculated the change in  $\beta$ -values from baseline to  
197 Year 6 ( $\Delta\beta = \text{Year 6} - \text{baseline}$ ), which was then correlated to time-to-  
198 diagnosis (i.e., years from baseline to when participant received diagnosis).

### 199 **Data availability**

200 The deidentified raw data set with normalized  $\beta$ -values and EWAS statistics will  
201 be deposited to the NCBI NIH Gene Expression Omnibus (this will be made  
202 available upon acceptance by a peer-reviewed journal).

203

## 204 **Results**

### 205 **Participant characteristics**

206 The study sample included almost equal numbers of men and women, and equal  
207 numbers of African American and Caucasian participants (**Table 1**). Baseline age  
208 ranged from 70 to 78 years with an average age of  $74 \pm 2.4$  years. Follow-up  
209 DNA collection occurred at Year 6, with the exception of one participant with  
210 follow up DNA collected at year 2 (Per7). Three participants had DNA from only  
211 one time point, and thus these were included in the cross-sectional analysis but  
212 not the time-dependent analysis.

213 During the Health ABC follow-up period, 7 participants (35%) were diagnosed  
214 with cancer at times ranging from 6 months to 11 years from baseline (**Table 1**).  
215 Cancer diagnoses included cancer of the prostate, colon, breast, and stomach,  
216 as well as one case of leukemia. There were no differences in race, sex, or  
217 baseline age or body mass index (BMI) between participants diagnosed with  
218 cancer and those who remained cancer-free (**Table 2**).

219

220

221

222

223

224 **Table 2. Baseline characteristics of participants by cancer diagnosis**

|                            | Cancer <sup>1</sup> |                     | p-value <sup>2</sup> |
|----------------------------|---------------------|---------------------|----------------------|
|                            | no                  | yes                 |                      |
| N                          | 13 (65%)            | 7 (35%)             |                      |
| Age                        | 74 ( $\pm$ 2.3)     | 75 ( $\pm$ 2.5)     | 0.29                 |
| Ancestry/race <sup>3</sup> |                     |                     | 0.64                 |
| AA                         | 7 (35%)             | 3 (15%)             |                      |
| EA                         | 6 (30%)             | 4 (20%)             |                      |
| Sex                        |                     |                     | 0.08                 |
| Female                     | 9 (45%)             | 2 (10%)             |                      |
| Male                       | 4 (20%)             | 5 (25%)             |                      |
| BMI                        | 27.01 ( $\pm$ 3.77) | 27.75 ( $\pm$ 5.42) | 0.72                 |

225 <sup>1</sup>Counts (percent of total) for categorical variables and mean (SD) for continuous variables

226 <sup>2</sup>P-values based on Chi-square test and ANOVA

227 <sup>3</sup>Self-reported race identity; EA = European Americans or Caucasians, and AA = African  
228 Americans

229

### 230 **Quality of DNA methylation data and outlier identification**

231 Unsupervised hierarchical clustering using the full set of probes showed that 15  
232 of the individuals with longitudinal data paired within the same participant  
233 (**Additional file 1: Figure S1B**). The two exceptions, Per1 (cancer-free) and  
234 Per9 (received cancer diagnosis at year 1 from baseline), did not cluster with  
235 self, and this observation suggests potential intra-individual discordance in the  
236 epigenetic data or increased cellular heterogeneity over time [24, 25]. To verify  
237 that the non-pairing longitudinal samples are indeed from the same respective  
238 participants, we performed the cluster analysis using only probes that were  
239 flagged for overlap with SNPs, as these provide a signal for underlying genotype  
240 variation. Using these SNP probes, all individuals with longitudinal samples,  
241 including Per1 and Per9, paired appropriately with self (**Additional file 2:**  
242 **Figures S2**). Overall, the PC and cluster plots showed no batched effects and a

243 generally stable methylation pattern over time, with the exception of the two  
244 participants. The QC analyses also identified Per13 as an outlier (**Additional file**  
245 **1: Figures S1B, S1C**). Since Per13 was diagnosed with leukemia within 6  
246 months of the first Health ABC visit, the distinct methylation pattern is consistent  
247 with disease-related changes in leukocyte composition, and Per13 was excluded  
248 from further analyses.

### 249 **Longitudinal changes in CpG-based blood cell composition**

250 We performed a CpG-based estimation of blood cell proportions [21-23] . We  
251 evaluated differences in blood composition between baseline and Year 6. The  
252 estimated proportion of CD8+ T-cells decreased, while the proportion of  
253 granulocytes increased (**Figure 1A, 1B; Table 3**). The proportions of the other  
254 blood leukocyte subtypes remained relatively stable with no significant  
255 differences between the two visits (estimates for all participants at both time  
256 points are in **Additional file 3: Table S1**). We however note pronounced  
257 changes in cell composition for Per1, one of the two participants that did not pair  
258 with self in the hierarchical cluster; cellular heterogeneity partly explains the  
259 discordance in the longitudinal data.

260

261

262

263 **Table 3. Association between cancer and CpG-based estimates of blood**  
 264 **cells and PC1**

| Comparison between baseline and year 6 <sup>†</sup> |                              |              |      |                            |               |                      |
|-----------------------------------------------------|------------------------------|--------------|------|----------------------------|---------------|----------------------|
|                                                     | Baseline                     |              |      | Year 6                     |               | p<br>(baseline vs 6) |
| CD8T                                                | 0.07 ± 0.06                  |              |      | 0.02 ± 0.02                |               | 0.006                |
| Gran                                                | 0.46 ± 0.14                  |              |      | 0.57 ± 0.14                |               | 0.02                 |
| PC1                                                 | -7.31 ± 15.7                 |              |      | 8.51 ± 13.41               |               | 0.004                |
| Cancer                                              | Baseline (cancer yes vs. no) |              |      | Year 6 (cancer yes vs. no) |               |                      |
|                                                     | No                           | Yes          | p    | No                         | Yes           | p                    |
| CD8T                                                | 0.08 ± 0.07                  | 0.04 ± 0.02  | 0.16 | 0.03 ± 0.02                | 0.003 ± 0.005 | 0.02                 |
| Gran                                                | 0.43 ± 0.14                  | 0.52 ± 0.12  | 0.17 | 0.52 ± 0.14                | 0.66 ± 0.09   | 0.04                 |
| PC1                                                 | -12.19 ± 13.73               | 2.45 ± 15.87 | 0.06 | 2.13 ± 10.99               | 19.14 ± 10.23 | 0.008                |

265 <sup>†</sup>Excludes Person 13 and data from Year 2

266 CD8T: CD8+ T-cells; Gran: granulocytes; PC1: principal component 1

### 267 **Association between CpG-based blood cell estimates and cancer**

268 We next examined if variation in blood cell composition was associated with  
 269 cancer diagnosis. We performed the analysis stratified by baseline and Year 6.  
 270 At baseline, none of the blood cells differentiated between those who developed  
 271 cancer and those who remained cancer-free. By Year 6, CD8+ T-cell proportion  
 272 was lower and granulocyte proportion was higher in the cancer-present group  
 273 with modest statistical significance (**Figure 1A, B; Table 3**).

### 274 **Global patterns in DNA methylation and association with cell composition**

275 To examine the global patterns of variation in the methylome, we performed PCA  
 276 using the 739,648 probes. PC1 to PC5 captured 49% of the variance in the data  
 277 (**Additional file 4: Data S1**). Age and BMI were not correlated with the top 5  
 278 PCs. PC4 showed an association with race only at Year 6 (p-value = 0.02), and

279 PC5 with sex only at baseline (p-value = 0.02) (full results in **Additional file 4:**  
280 **Data S1**).

281 Correlation with blood cell estimates showed that PC1, which accounts for 21%  
282 of the variance, had a strong positive correlation with granulocytes and negative  
283 correlations with lymphoid cells (T-cells, B-cells, and natural killer or NK cells) at  
284 both baseline and Year 6 (full correlation matrix is provided in **Additional file 4:**  
285 **Data S1**). PC5 was positively correlated with monocytes at both baseline and  
286 Year 6 (**Additional file 4: Data S1**).

### 287 **Global patterns in DNA methylation and association with cancer**

288 We next evaluated whether the PCs could differentiate between individuals who  
289 remained cancer-free compared to those who received a cancer diagnosis. PC1,  
290 which captured the variation in cellular composition, showed a modest  
291 association with cancer diagnosis at baseline and this became stronger by Year  
292 6 (**Table 3; Figure 1C**). The remaining 4 PCs were not associated with cancer  
293 (**Additional file 4: Data S1**).

### 294 **Differential CpG methylation between cancer and cancer-free groups**

295 Following the PC analysis, we explored differential methylation at the level of  
296 individual CpGs. Given the small sample size, we carried out simple t-tests to  
297 compare the cancer-present vs. cancer-free groups at Year 6, the time when  
298 PC1 showed a significant difference between the two groups. To control for  
299 cellular heterogeneity and unmeasured confounding variables, we performed the

300 EWAS using residual  $\beta$ -values adjusted for the first 5 PCs. No CpG reached the  
301 genome-wide significant threshold ( $p$ -value  $\leq 5 \times 10^{-8}$ ). However, three CpGs,  
302 including one located in an intronic CpG island of the metastasis associated gene  
303 (cg02162462, *MTA3*), were genome-wide suggestive ( $p$ -value  $\leq 10^{-5}$ ) (**Figure 2**).  
304 We considered the top 10 cancer-associated CpGs and evaluated these for  
305 replication (**Table 4**). Among these top 10, 5 CpGs were associated with lower  
306 methylation in the cancer group (cancer-hypomethylated), and the remaining 5  
307 showed higher methylation in the cancer group (cancer-hypermethylated). To  
308 test for replication, we cross-checked our results with those from Roos et al.,  
309 which evaluated for pan-cancer CpG biomarkers in blood using the previous  
310 version of the Illumina Human Methylation 450K (HM450K) array. [16]. Of the top  
311 10 CpGs in **Table 4**, 5 probes were also represented in the HM450K array. The  
312 CpG in the intron of *RPTOR* (cg08129331), which was cancer-hypomethylated in  
313 Health ABC, also showed a similar hypomethylation in the Roos cohort at  $p$ -value  
314 = 0.05. The CpG in the 3' UTR of *MRPL44*, which showed cancer-  
315 hypermethylation in Health ABC, showed hypermethylation in the Roos cohort at  
316  $p$ -value = 0.08.

### 317 **Longitudinal changes in CpG methylation and diagnosis time**

318 Since these CpGs differentiated between those who developed cancer and those  
319 who remained cancer-free at Year 6, we then explored if the longitudinal changes  
320 in methylation over time ( $\Delta\beta = \text{Year 6} - \text{baseline}$ ) could be related to time to  
321 cancer diagnosis. For the 5 cancer-hypomethylated CpGs in **Table 4**, we



322 predicted that the within-individual decline in methylation at Year 6 (negative  
 323  $\Delta\beta$ ) would be greater in those who were closer to diagnosis (positive  
 324 correlation with years to diagnosis or YTD). Inversely, for the 5 cancer-  
 325 hypermethylated CpGs, we predicted that the within-individual increase in  
 326 methylation at Year 6 (positive  $\Delta\beta$ ) would be greater in those closer to  
 327 diagnosis (negative correlation with YTD). With the exception of three probes that  
 328 showed Pearson correlation near 0, the remaining seven CpGs showed a  
 329 correlation pattern that was consistent with our predictions (**Table 4**). The CpGs  
 330 in *REC8* (cg07516252), *RPTOR*, and *ZSWIMS* (cg04429789) were statistically  
 331 significant at  $p\text{-value} \leq 0.05$ . **Figure 3** shows the longitudinal plots for these 3  
 332 CpGs and the correlation between  $\Delta\beta$  and YTD.

333 **Table 4. Top 10 cancer associated CpGs**

| ProbeID    | Chr (Mb)  | Location <sup>2</sup>         | Residual $\beta$ -<br>value<br>Y6 ttest in<br>HABC <sup>3</sup> | Replication<br>in Roos. et<br>al.       | Correlation<br>of Y6-Y1<br>with YTD in<br>HABC <sup>5</sup> |
|------------|-----------|-------------------------------|-----------------------------------------------------------------|-----------------------------------------|-------------------------------------------------------------|
|            |           |                               | Canc. yes-<br>no<br>(pval)                                      | Canc. yes-<br>no<br>(pval) <sup>4</sup> | R                                                           |
| cg09608390 | 17(1.00)  | exon <i>ABR</i>               | 0.019<br>(1.1E-06)                                              |                                         | -0.42<br>(0.41)                                             |
| cg01399430 | 5(6.52)   | intergenic                    | -0.048<br>(5.6E-06)                                             |                                         | 0.34<br>(0.50)                                              |
| cg02162462 | 2(42.8)   | Intron1 <i>MTA3</i> ;<br>CGI  | -0.027<br>(1.0E-05)                                             | 0.02<br>(0.93)                          | 0.63<br>(0.18)                                              |
| cg25105842 | 2(224.83) | 3'UTR <i>MRPL44</i>           | 0.016<br>(1.6E-05)                                              | 0.37<br>(0.08)                          | 0.09<br>(0.86)                                              |
| cg05808305 | 11(2.77)  | intron; <i>KCNQ1</i>          | -0.016<br>(1.8E-05)                                             |                                         | 0.30<br>(0.57)                                              |
| cg25403416 | 19(30.19) | 3'UTR;<br><i>C19orf12</i>     | 0.019<br>(1.8E-05)                                              | -0.14<br>(0.30)                         | -0.06<br>(0.91)                                             |
| cg07516252 | 14(24.64) | promoter<br><i>REC8</i> ; CGI | -0.038<br>(2.0E-05)                                             | 0.08<br>(0.37)                          | <b>0.89</b><br><b>(0.02)</b>                                |

|            |           |                      |                     |                               |                               |
|------------|-----------|----------------------|---------------------|-------------------------------|-------------------------------|
| cg08129331 | 17(78.56) | Intron1 <i>RPTOR</i> | -0.039<br>(2.4E-05) | <b>-0.13</b><br><b>(0.05)</b> | <b>0.83</b><br><b>(0.04)</b>  |
| cg11784099 | 21(46.23) | Intron1 <i>SUMO3</i> | 0.035<br>(2.4E-05)  |                               | -0.06<br>(0.91)               |
| cg04429789 | 1(45.52)  | intron <i>ZSWIM5</i> | 0.024<br>(2.7E-05)  |                               | <b>-0.81</b><br><b>(0.05)</b> |
| CD8T       |           |                      | -0.027<br>(0.02)    |                               | -0.202<br>(0.70)              |
| Gran       |           |                      | 0.14<br>(0.04)      |                               | -0.05<br>(0.93)               |
| PC1        |           |                      | 17.01(0.008)        |                               | -0.21<br>(0.69)               |

334 <sup>1</sup> GRCh37/hg19

335 <sup>2</sup> CGI is CpG island

336 <sup>3</sup> Mean difference between cancer-present and cancer-free groups of Health ABC at Year 6 and t-  
337 test p-values

338 <sup>4</sup> Mean difference between cancer discordant twins in Roos et al. (yes – no) and t-test p-values

339 <sup>5</sup> Mean Correlation between years to diagnosis and longitudinal change in residual  $\beta$ -values  
340 ( $\Delta\beta = \text{Year 6} - \text{baseline}$ ) in cancer group of Health ABC

341

## 342 Discussion

### 343 Summary

344 In this study, we evaluated two aspects of the aging methylome in an older group  
345 of participants: (1) differences in DNA methylation patterns between those who  
346 developed cancer and those who remained cancer-free, and (2) the longitudinal  
347 trajectory over time. We used DNA purified from peripheral blood cells collected  
348 from a subset of Health ABC Study participants who provided DNA samples  
349 separated by approximately 5 years. Overall, there was strong intra-individual  
350 stability from baseline to Year 6, and with the exception of two participants, all  
351 other participants with longitudinal samples paired with self when grouped by  
352 unsupervised hierarchical clustering. When a large number of random CpGs or  
353 genome-wide data are used in such clustering analysis, samples generally group

354 by age and shared genotype (i.e., either monozygotic twins or with self), with few  
355 exceptions [26-28]. The few exceptions likely reflect individual discordance and  
356 epigenetic drift that occurs within a person, particularly at old age [24, 25]. We  
357 found that cellular composition is a major source of variation and significantly  
358 contributed to the variance explained by the primary principal component (PC1).  
359 In terms of the biomarker utility of DNA methylation, our study highlighted a few  
360 CpGs as potential biomarkers, and the dynamic changes over time at these  
361 CpGs were correlated with time to cancer diagnosis.

### 362 ***Cellular heterogeneity as both informative and a potential confounder***

363 Cellular composition is clearly a major correlate of DNA methylation and can be a  
364 confounding variable when we attempt to relate the methylome derived from  
365 heterogeneous tissue to aging and disease [29]. The composition of cells in  
366 circulating blood can be influenced by natural immune aging and also by  
367 numerous correlated health variables including lifestyle, infectious disease,  
368 leukemia or similar cancers, and environmental exposures. For example, one of  
369 the most consistent features of the aging immune system involves thymic  
370 involution and the time-dependent decline in both the absolute number and the  
371 relative percent of naïve CD8+ T-cells [30-33]. A strategy to estimate the  
372 composition of cells from DNA methylation data is to rely on specific CpGs that  
373 are known to be strong cell-specific markers and can serve as surrogate  
374 measures of cellular sub-types [21-23]. With the current data, we applied this *in*  
375 *silico* approach to estimate the relative proportions of CD8+ T-cells, CD4+ T-  
376 cells, B-cells, NK cells, granulocytes, and monocytes. The DNA methylation-

377 based estimates of cell proportions showed a decrease in CD8+ T-cells and an  
378 increase in granulocytes over the course of 5 years. By Year 6 from baseline, the  
379 proportion of CD8+ T-cells was lower and proportion of granulocytes higher in the  
380 cancer-present group relative to the cancer-free group. Since the first few PCs  
381 captured the variance due to cellular composition, PC1 also showed a similar  
382 change over time. PC1 showed a slight distinction between the cancer-present  
383 vs. cancer-free groups even at baseline, and this became more pronounced by  
384 Year 6. These differences are likely because PC1 summarized the changes in  
385 the composition of multiple cell subtypes including those that were not estimated  
386 using the reference set of cell-specific CpGs. PCA may therefore be more  
387 effective at capturing the composite changes arising from different cellular  
388 subtypes and may also be more disease-informative than the estimated  
389 proportion of major cell types.

390 Our observations are consistent with the general decrease in lymphoid cells and  
391 increase in myeloid cells during aging [30-32]. In line with the lower lymphocytes  
392 and higher granulocytes in the cancer group, work from both model organisms  
393 and humans have shown an inverse relationship between lymphocytes and  
394 granulocytes with lower B-cells and T-cells, and higher neutrophils being  
395 associated with higher mortality risk [34-36]. While we cannot disentangle the  
396 inter-correlations between aging, cell composition, and methylation patterns, our  
397 results do demonstrate that DNA methylation data derived from peripheral blood  
398 in older participants can be used to glean information on their cellular profiles,  
399 and this in turn can be related to their health and disease status.

## 400 **Identifying (pan)cancer CpGs**

401 Following the cell estimation and PC analysis, we took an EWAS approach to  
402 examine differential methylation at the level of individual CpGs. Previous studies  
403 have already demonstrated that DNA methylation patterns can provide a  
404 powerful “pan-cancer” biomarker—i.e., an epigenetic signature of cancer that can  
405 serve as a general biomarker for the presence of cancer, and possibly different  
406 cancer types as well [37, 38]. The majority of these studies have involved  
407 comparisons between normal vs. tumor tissue, or are dependent on the shedding  
408 of cell-free DNA from the primary site of cancer and therefore are indicators of *in*  
409 *situ* changes that occur in tumor cells [37, 39-43]. Relatively few studies have  
410 taken a prospective approach that involves sample collection prior to disease  
411 diagnosis [44, 45], and even fewer have attempted to track longitudinal changes  
412 across multiple timepoints [14, 15]. Nevertheless, these few prospective studies  
413 have shown that both the global patterns and DNA methylation at specific CpG  
414 sites can be indicators of cancer, and even more strikingly, that some of these  
415 generalized changes can be detected in circulating blood cells [14, 15, 44, 45].

416 Given this background, our goal was to examine if we can also detect similar  
417 “pan-cancer” CpG biomarkers. We used a simple approach and contrasted DNA  
418 methylation between the cancer-present and cancer-free groups at Year 6, the  
419 time when we expect the differences to be more pronounced. Despite the small  
420 sample size, 3 CpGs passed the conventional genome-wide suggestive  
421 threshold of  $10^{-5}$  [46], and the suggestive hits included a CpG located in the first  
422 intron and overlapping a CpG island within the metastasis associated 1 family

423 member 3 (*MTA3*), a gene known to play a role in tumorigenesis and metastasis.  
424 To incorporate the longitudinal information, we then focused on the top 10  
425 differentially methylated CpGs and examined whether the within-individual  
426 longitudinal changes in  $\beta$ -values in the cancer group were correlated with time to  
427 diagnosis. Due to the small sample size, it was not feasible to evaluate  
428 correlations with cancer stage or progression, and the correlations were  
429 examined only for the time to the first adjudicated diagnosis. The overall trend  
430 indicated that the magnitude of change over five years, with greater negative  
431 slope for cancer-hypomethylated CpGs and correspondingly greater positive  
432 slope for cancer-hypermethylated CpGs, was correlated with the time to cancer  
433 diagnosis. Although this analysis was carried out in only the 6 cancer cases, the  
434 correlations between  $\Delta\beta$  and time to diagnosis were significant for the CpGs  
435 in the promoter region of *REC8*, and introns of *RPTOR* and *ZSWIM5*.

436 To gather additional lines of evidence, we examined if the association with  
437 cancer for these CpGs can be replicated in an independent dataset, and if the  
438 cognate genes have been previously related to cancer or tumorigenesis. For  
439 replication we referred to the work by Roos et al. [16]. While the study by Roos et  
440 al. compared cancer-discordant monozygotic twins and involved a much wider  
441 age range, some design features common to our study are: (1) the cancer group  
442 included samples collected from individuals who had already received cancer  
443 diagnosis (post-diagnosis) and from individuals within 5 years to diagnosis (pre-  
444 diagnosis), (2) a variety of cancer types were represented, and (3) genome-wide  
445 DNA methylation was measured using peripheral blood cells. In the Health ABC

446 Study set, 3 participants (excluding Per13 with leukemia) had been diagnosed by  
447 Year 6, and the remaining participants received a diagnosis 1–5 years after Year  
448 6. Since the Roos dataset was generated on the previous version of the Illumina  
449 DNA methylation arrays (HM450K), only 5 of the top 10 probes were represented  
450 on that array and could be evaluated for replication. Only the CpG in the intron of  
451 *RPTOR* (cg08129331) was replicated and was also associated with a  
452 consistently lower methylation in the cancer group ( $p$ -value = 0.05 in Roos  
453 study). The 3'UTR CpG in *MRPL44* (cg25105842) showed a consistent increase  
454 in methylation in the Roos study, but this did not reach statistical significance ( $p$ -  
455 value = 0.08).

#### 456 ***Cancer associated CpGs in tumor suppressor genes***

457 Eight of the top ten cancer CpGs were located within annotated gene features  
458 including the top CpG, cg09608390, located in the exon of RhoGEF and GTPase  
459 activating protein gene, *ABR*. We did not find a clear-cut link between *ABR* and  
460 cancer in the existing literature. However, among the eight genes in the list,  
461 *REC8* (meiotic recombination protein) is a known tumor suppressor. There is  
462 also evidence that *KCNQ1* (potassium voltage-gated channel member), *MTA3*,  
463 and *ZSWIM5* (zinc finger SWIM-type 5) have tumor suppressive roles.

464 *MTA3* is a chromatin remodeling protein that has a complex association with  
465 cancer [47, 48]. In certain types of malignant tumors such as glioma, certain  
466 breast cancers, and adenocarcinomas, *MTA3* is under-expressed and is  
467 implicated as a tumor suppressor [48-51]. In other carcinomas such as

468 hepatocellular, lung, gastric, and colorectal cancers, *MTA3* is reported to be  
469 overexpressed, with higher expression correlated with tumor progression and  
470 poorer prognosis [52-56]. In the Health ABC samples, the CpG (cg02162462)  
471 located in the first intron of *MTA3* and overlapping a CpG island had lower  
472 methylation in the cancer-present group at Year 6. At baseline, there was no  
473 significant difference between the groups. The negative  $\Delta\beta$ , though not  
474 statistically significant, was greater in participants closer to receiving a clinical  
475 cancer diagnosis (Pearson correlation  $R = 0.63$ ). While we could not replicate  
476 this CpG in the Roos dataset, the collective evidence suggests that methylation  
477 changes in the CpG island of *MTA3* may be associated with tumor development  
478 and progression.

479 *REC8* has a more consistent tumor suppressive role and promoter  
480 hypermethylation and suppression of its expression occurs in tumor cells [57-60].  
481 In the Health ABC samples, the CpG in the promoter (cg07516252) was  
482 hypomethylated and not hypermethylated in the group that received cancer  
483 diagnosis. The rate of promoter hypomethylation was also significantly correlated  
484 with time to diagnosis ( $R = 0.89$ ). Since our study is blood-based and does not  
485 stem from the primary tumor site, the hypomethylation may indicate aberrant  
486 methylation over time in individuals, with greater changes observed in those  
487 individuals who are closer to clinical manifestations. However, this promoter CpG  
488 did not replicate in the Roos data.

489 *KCNQ1* is another tumor suppressor gene, and loss of its expression is  
490 considered to be an indicator of metastasis and poor prognosis [61-63]. There is



491 also evidence that the reduction in *KCNQ1* expression in cancer cells may be  
492 mediated by promoter hypermethylation [62, 64]. In the Health ABC samples, the  
493 intronic CpG (cg05808305) had much lower methylation in the cancer group and  
494 was significant only at Year 6. Among the known and potential tumor suppressive  
495 genes, only the intronic CpG in *ZSWIM5* (cg04429789) was associated with  
496 hypermethylation in the Health ABC cancer diagnosed group; for this CpG, the  
497 positive  $\Delta\beta$  was significantly correlated with time to diagnosis with greater  
498 positive change in those closer to receiving a diagnosis ( $R = -0.81$ ). So far, we  
499 have found only one study showing that the expression of *ZSWIM5* inhibits  
500 malignant progression [65]. We could not test replication for the CpG in *ZSWIM5*  
501 since this was not a probe that was included in the HM450K array.

502 Based on the multiple lines of evidence, we highlight the CpG in the first intron of  
503 *RPTOR* (cg08129331) as a stronger potential pan-cancer biomarker as this  
504 specific CpG was replicated in the Roos data. This gene codes for a member of  
505 the mTOR protein complex, which plays a key role in cell growth and  
506 proliferation, and dysregulation of this signaling pathway is a common feature in  
507 cancers [66]. The lower methylation of this CpG in cancer-free individuals in  
508 Health ABC was significant only in Year 6. For the longitudinal change, the  
509 correlation between the  $\Delta\beta$  and time to diagnosis was significant for  
510 cg08129331. This specific CpG has been previously presented as a marker to  
511 differentiate between different medulloblastoma subtypes [67]. Another study has  
512 also indicated that the decrease in methylation in *RPTOR* measured in peripheral  
513 blood may be a biomarker for breast cancer, although this failed replication in a

514 follow-up study [68, 69]. Similar to *REC8*, there was more negative change in  $\beta$ -  
515 value from Year 1 to 6 in individuals closer to receiving a cancer diagnosis.

## 516 ***Limitations***

517 The present work was carried out in a very small and heterogenous group of  
518 participants. The cancer-present group consisted of different types of cancers,  
519 and there was a combination of individuals who received the diagnosis before  
520 and after Year 6. The differences in DNA methylation should therefore be  
521 interpreted as potential correlates rather than predictive indicators of disease.  
522 Due to the limitation in sample number, we performed simple t-test comparisons  
523 rather than more complex regressions such as mixed modeling. Furthermore, we  
524 considered the cancer diagnosis as the main outcome variable and did not  
525 account for cancer type, stage or progression. Additionally, while we took steps  
526 to statistically correct for immune cell composition, the data was derived from  
527 white blood cells from older participants. The *in-silico* approach to estimate cell  
528 composition cannot discern the finer repertoire of cellular subtypes that are  
529 known to change particularly in older individuals. The results we present  
530 therefore require further replication in a larger cohort. Our study is mainly a  
531 demonstration of concept that highlights the utility of longitudinal blood collection  
532 and the potential information on health and disease that can be gained by  
533 tracking dynamic changes in the methylome.

534

535

536 **Conclusion**

537 Taken together, our analysis detected global changes in the methylome that are  
538 partly due to cellular heterogeneity and also due to changes at specific CpGs that  
539 could indicate cancer development and progression. From the multiple lines of  
540 evidence, we posit methylation in *RPTOR* as a potential biomarker of cancer that  
541 justifies further investigation and validation.

542 **Abbreviations**

543 CGI: CpG island

544 EA = European Americans or Caucasians; AA = African Americans

545 EWAS: epigenome-wide association studies

546 Gran: granulocytes

547 Health ABC: Health, Aging and Body Composition Study

548 HM850K: Illumina Infinium Human MethylationEPIC; HM450K: Illumina Human

549 Methylation 450K

550 NK cells: natural killer cells

551 PCA: principal component analysis; PC: principal components

552 QC: quality checks

553 SNP: single nucleotide polymorphism

554 YTD: years to diagnosis

555

## 556 **Declarations**

557 **Ethics approval and consent to participate:** All participants provided written

558 informed consent and all Health ABC Study sites received IRB approval

559 **Consent for publication:** Not applicable

560 **Data availability:** Full raw data normalized data and full EWAS statistics will be

561 deposited to the NCBI NIH Gene Expression Omnibus (will be submitted upon

562 acceptance by a peer-reviewed journal).

563 **Competing interests:** We have no financial or non-financial conflicts of interest

564 **Funding:** This work was supported by funds from UTHSC Faculty Award

565 UTCOM-2013KM. The Health ABC Study research was funded in part by the

566 Intramural Research Program of the NIH, National Institute on Aging (NIA), and

567 supported by NIA Contracts N01-AG-6-2101; N01-AG-6-2103; N01-AG-6-2106;

568 NIA grant R01-AG028050, and NINR grant R01-NR012459.

569 **Author contributions:** AHB: performed analysis and contributed to the writing of

570 the manuscript; JWJ and JVSJ: helped with data analysis and contributed to the

571 final manuscript; JHF and KCJ: helped with interpretation and contributed to the

572 writing of the manuscript; EMS: helped with interpretation and contributed to the

573 final manuscript; KM designed the study, contributed to data analysis and  
574 interpretation, and prepared the manuscript.

## 575 **Acknowledgements**

576 We are very thankful to the Health ABC Study for granting us access to the data  
577 and DNA samples. We also express our deep gratitude to the late Dr. Suzanne  
578 (Suzy) Satterfield, M.D., for the help and advice she provided. This work was  
579 supported by funds from UTHSC Faculty Award UTCOM-2013KM. The Health  
580 ABC Study research was funded in part by the Intramural Research Program of  
581 the NIH, National Institute on Aging (NIA), and supported by NIA Contracts N01-  
582 AG-6-2101; N01-AG-6-2103; N01-AG-6-2106; NIA grant R01-AG028050, and  
583 NINR grant R01-NR012459.

## 584 **References:**

- 585 1. Rakyan VK, Down TA, Balding DJ, Beck S: **Epigenome-wide association**  
586 **studies for common human diseases.** *Nat Rev Genet* 2011, **12**:529-541.
- 587 2. Paul DS, Beck S: **Advances in epigenome-wide association studies for**  
588 **common diseases.** *Trends Mol Med* 2014, **20**:541-543.
- 589 3. Lappalainen T, Grealley JM: **Associating cellular epigenetic models with**  
590 **human phenotypes.** *Nat Rev Genet* 2017, **18**:441-451.
- 591 4. Birney E, Smith GD, Grealley JM: **Epigenome-wide Association Studies and**  
592 **the Interpretation of Disease -Omics.** *PLoS Genet* 2016, **12**:e1006105.
- 593 5. Feinberg AP, Tycko B: **The history of cancer epigenetics.** *Nat Rev Cancer*  
594 2004, **4**:143-153.
- 595 6. Feinberg AP, Vogelstein B: **Hypomethylation distinguishes genes of some**  
596 **human cancers from their normal counterparts.** *Nature* 1983, **301**:89-92.
- 597 7. Gama-Sosa MA, Slagel VA, Trewyn RW, Oxenhandler R, Kuo KC, Gehrke CW,  
598 Ehrlich M: **The 5-methylcytosine content of DNA from human tumors.**  
599 *Nucleic Acids Res* 1983, **11**:6883-6894.
- 600 8. Gonzalez-Zulueta M, Bender CM, Yang AS, Nguyen T, Beart RW, Van Tornout  
601 JM, Jones PA: **Methylation of the 5' CpG island of the p16/CDKN2 tumor**

- 602 **suppressor gene in normal and transformed human tissues correlates**  
603 **with gene silencing.** *Cancer Res* 1995, **55**:4531-4535.
- 604 9. Greger V, Passarge E, Hopping W, Messmer E, Horsthemke B: **Epigenetic**  
605 **changes may contribute to the formation and spontaneous regression**  
606 **of retinoblastoma.** *Hum Genet* 1989, **83**:155-158.
- 607 10. Hansen KD, Timp W, Bravo HC, Sabunciyan S, Langmead B, McDonald OG,  
608 Wen B, Wu H, Liu Y, Diep D, et al: **Increased methylation variation in**  
609 **epigenetic domains across cancer types.** *Nat Genet* 2011, **43**:768-775.
- 610 11. Brennan K, Flanagan JM: **Is there a link between genome-wide**  
611 **hypomethylation in blood and cancer risk?** *Cancer Prev Res (Phila)* 2012,  
612 **5**:1345-1357.
- 613 12. Brennan K, Garcia-Closas M, Orr N, Fletcher O, Jones M, Ashworth A,  
614 Swerdlow A, Thorne H, Investigators KC, Riboli E, et al: **Intragenic ATM**  
615 **methylation in peripheral blood DNA as a biomarker of breast cancer**  
616 **risk.** *Cancer Res* 2012, **72**:2304-2313.
- 617 13. Dugue PA, Brinkman MT, Milne RL, Wong EM, FitzGerald LM, Bassett JK, Joo  
618 JE, Jung CH, Makalic E, Schmidt DF, et al: **Genome-wide measures of DNA**  
619 **methylation in peripheral blood and the risk of urothelial cell**  
620 **carcinoma: a prospective nested case-control study.** *Br J Cancer* 2016,  
621 **115**:664-673.
- 622 14. Joyce BT, Gao T, Liu L, Zheng Y, Liu S, Zhang W, Penedo F, Dai Q, Schwartz J,  
623 Baccarelli AA, Hou L: **Longitudinal Study of DNA Methylation of**  
624 **Inflammatory Genes and Cancer Risk.** *Cancer Epidemiol Biomarkers Prev*  
625 2015, **24**:1531-1538.
- 626 15. Joyce BT, Gao T, Zheng Y, Liu L, Zhang W, Dai Q, Shrubsole MJ, Hibler EA,  
627 Cristofanilli M, Zhang H, et al: **Prospective changes in global DNA**  
628 **methylation and cancer incidence and mortality.** *Br J Cancer* 2016,  
629 **115**:465-472.
- 630 16. Roos L, van Dongen J, Bell CG, Burri A, Deloukas P, Boomsma DI, Spector TD,  
631 Bell JT: **Integrative DNA methylome analysis of pan-cancer biomarkers**  
632 **in cancer discordant monozygotic twin-pairs.** *Clin Epigenetics* 2016, **8**:7.
- 633 17. Resnick HE, Shorr RI, Kuller L, Franse L, Harris TB: **Prevalence and clinical**  
634 **implications of American Diabetes Association-defined diabetes and**  
635 **other categories of glucose dysregulation in older adults: the health,**  
636 **aging and body composition study.** *J Clin Epidemiol* 2001, **54**:869-876.
- 637 18. [<https://healthabc.nia.nih.gov>]
- 638 19. Aryee MJ, Jaffe AE, Corrada-Bravo H, Ladd-Acosta C, Feinberg AP, Hansen KD,  
639 Irizarry RA: **Minfi: a flexible and comprehensive Bioconductor package**  
640 **for the analysis of Infinium DNA methylation microarrays.** *Bioinformatics*  
641 2014, **30**:1363-1369.
- 642 20. Zhou W, Laird PW, Shen H: **Comprehensive characterization, annotation**  
643 **and innovative use of Infinium DNA methylation BeadChip probes.**  
644 *Nucleic Acids Res* 2017, **45**:e22.
- 645 21. Jaffe AE, Irizarry RA: **Accounting for cellular heterogeneity is critical in**  
646 **epigenome-wide association studies.** *Genome Biol* 2014, **15**:R31.

- 647 22. Houseman EA, Molitor J, Marsit CJ: **Reference-free cell mixture**  
648 **adjustments in analysis of DNA methylation data.** *Bioinformatics* 2014,  
649 **30:1431-1439.**
- 650 23. Houseman EA, Accomando WP, Koestler DC, Christensen BC, Marsit CJ,  
651 Nelson HH, Wiencke JK, Kelsey KT: **DNA methylation arrays as surrogate**  
652 **measures of cell mixture distribution.** *BMC Bioinformatics* 2012, **13:86.**
- 653 24. Tan Q, Heijmans BT, Hjelmborg JV, Soerensen M, Christensen K, Christiansen  
654 L: **Epigenetic drift in the aging genome: a ten-year follow-up in an**  
655 **elderly twin cohort.** *Int J Epidemiol* 2016, **45:1146-1158.**
- 656 25. Fraga MF, Ballestar E, Paz MF, Ropero S, Setien F, Ballestar ML, Heine-Suner  
657 D, Cigudosa JC, Urioste M, Benitez J, et al: **Epigenetic differences arise**  
658 **during the lifetime of monozygotic twins.** *Proc Natl Acad Sci U S A* 2005,  
659 **102:10604-10609.**
- 660 26. Dere E, Huse S, Hwang K, Sigman M, Boekelheide K: **Intra- and inter-**  
661 **individual differences in human sperm DNA methylation.** *Andrology*  
662 2016, **4:832-842.**
- 663 27. Zhang N, Zhao S, Zhang SH, Chen J, Lu D, Shen M, Li C: **Intra-Monozygotic**  
664 **Twin Pair Discordance and Longitudinal Variation of Whole-Genome**  
665 **Scale DNA Methylation in Adults.** *PLoS One* 2015, **10:e0135022.**
- 666 28. Martino D, Loke YJ, Gordon L, Ollikainen M, Cruickshank MN, Saffery R, Craig  
667 JM: **Longitudinal, genome-scale analysis of DNA methylation in twins**  
668 **from birth to 18 months of age reveals rapid epigenetic change in early**  
669 **life and pair-specific effects of discordance.** *Genome Biol* 2013, **14:R42.**
- 670 29. Teschendorff AE, West J, Beck S: **Age-associated epigenetic drift:**  
671 **implications, and a case of epigenetic thrift?** *Hum Mol Genet* 2013, **22:R7-**  
672 **R15.**
- 673 30. Vescovini R, Fagnoni FF, Telera AR, Bucci L, Pedrazzoni M, Magalini F, Stella  
674 A, Pasin F, Medici MC, Calderaro A, et al: **Naive and memory CD8 T cell pool**  
675 **homeostasis in advanced aging: impact of age and of antigen-specific**  
676 **responses to cytomegalovirus.** *Age (Dordr)* 2014, **36:625-640.**
- 677 31. Pawelec G: **Age and immunity: What is "immunosenescence"?** *Exp*  
678 *Gerontol* 2018, **105:4-9.**
- 679 32. Linton PJ, Dorshkind K: **Age-related changes in lymphocyte development**  
680 **and function.** *Nat Immunol* 2004, **5:133-139.**
- 681 33. Gui J, Mustachio LM, Su DM, Craig RW: **Thymus Size and Age-related**  
682 **Thymic Involution: Early Programming, Sexual Dimorphism,**  
683 **Progenitors and Stroma.** *Aging Dis* 2012, **3:280-290.**
- 684 34. Moeller M, Hirose M, Mueller S, Roelf C, Baltrusch S, Ibrahim S, Junghanss C,  
685 Wolkenhauer O, Jaster R, Kohling R, et al: **Inbred mouse strains reveal**  
686 **biomarkers that are pro-longevity, antilongevity or role switching.**  
687 *Aging Cell* 2014, **13:729-738.**
- 688 35. Leng SX, Xue QL, Huang Y, Ferrucci L, Fried LP, Walston JD: **Baseline total**  
689 **and specific differential white blood cell counts and 5-year all-cause**  
690 **mortality in community-dwelling older women.** *Exp Gerontol* 2005,  
691 **40:982-987.**

- 692 36. Izaks GJ, Remarque EJ, Becker SV, Westendorp RG: **Lymphocyte count and**  
693 **mortality risk in older persons. The Leiden 85-Plus Study.** *J Am Geriatr*  
694 *Soc* 2003, **51**:1461-1465.
- 695 37. Cline MS, Craft B, Swatloski T, Goldman M, Ma S, Haussler D, Zhu J: **Exploring**  
696 **TCGA Pan-Cancer data at the UCSC Cancer Genomics Browser.** *Sci Rep*  
697 2013, **3**:2652.
- 698 38. Witte T, Plass C, Gerhauser C: **Pan-cancer patterns of DNA methylation.**  
699 *Genome Med* 2014, **6**:66.
- 700 39. Leygo C, Williams M, Jin HC, Chan MWY, Chu WK, Grusch M, Cheng YY: **DNA**  
701 **Methylation as a Noninvasive Epigenetic Biomarker for the Detection of**  
702 **Cancer.** *Dis Markers* 2017, **2017**:3726595.
- 703 40. Lange CP, Campan M, Hinoue T, Schmitz RF, van der Meulen-de Jong AE,  
704 Slingerland H, Kok PJ, van Dijk CM, Weisenberger DJ, Shen H, et al: **Genome-**  
705 **scale discovery of DNA-methylation biomarkers for blood-based**  
706 **detection of colorectal cancer.** *PLoS One* 2012, **7**:e50266.
- 707 41. Kneip C, Schmidt B, Seegebarth A, Weickmann S, Fleischhacker M, Liebenberg  
708 V, Field JK, Dietrich D: **SHOX2 DNA methylation is a biomarker for the**  
709 **diagnosis of lung cancer in plasma.** *J Thorac Oncol* 2011, **6**:1632-1638.
- 710 42. Hao X, Luo H, Krawczyk M, Wei W, Wang W, Wang J, Flagg K, Hou J, Zhang H,  
711 Yi S, et al: **DNA methylation markers for diagnosis and prognosis of**  
712 **common cancers.** *Proc Natl Acad Sci U S A* 2017, **114**:7414-7419.
- 713 43. Brait M, Banerjee M, Maldonado L, Ooki A, Loyo M, Guida E, Izumchenko E,  
714 Mangold L, Humphreys E, Rosenbaum E, et al: **Promoter methylation of**  
715 **MCAM, ERalpha and ERbeta in serum of early stage prostate cancer**  
716 **patients.** *Oncotarget* 2017, **8**:15431-15440.
- 717 44. Zhuang J, Jones A, Lee SH, Ng E, Fiegl H, Zikan M, Cibula D, Sargent A, Salvesen  
718 HB, Jacobs IJ, et al: **The dynamics and prognostic potential of DNA**  
719 **methylation changes at stem cell gene loci in women's cancer.** *PLoS*  
720 *Genet* 2012, **8**:e1002517.
- 721 45. Teschendorff AE, Jones A, Fiegl H, Sargent A, Zhuang JJ, Kitchener HC,  
722 Widschwendter M: **Epigenetic variability in cells of normal cytology is**  
723 **associated with the risk of future morphological transformation.**  
724 *Genome Med* 2012, **4**:24.
- 725 46. Stranger BE, Stahl EA, Raj T: **Progress and promise of genome-wide**  
726 **association studies for human complex trait genetics.** *Genetics* 2011,  
727 **187**:367-383.
- 728 47. Fujita N, Jaye DL, Kajita M, Geigerman C, Moreno CS, Wade PA: **MTA3, a Mi-**  
729 **2/NuRD complex subunit, regulates an invasive growth pathway in**  
730 **breast cancer.** *Cell* 2003, **113**:207-219.
- 731 48. Fearon ER: **Connecting estrogen receptor function, transcriptional**  
732 **repression, and E-cadherin expression in breast cancer.** *Cancer Cell*  
733 2003, **3**:307-310.
- 734 49. Shan S, Hui G, Hou F, Shi H, Zhou G, Yan H, Wang L, Liu J: **Expression of**  
735 **metastasis-associated protein 3 in human brain glioma related to**  
736 **tumor prognosis.** *Neurol Sci* 2015, **36**:1799-1804.



- 737 50. Dong H, Guo H, Xie L, Wang G, Zhong X, Khoury T, Tan D, Zhang H: **The**  
738 **metastasis-associated gene MTA3, a component of the Mi-2/NuRD**  
739 **transcriptional repression complex, predicts prognosis of**  
740 **gastroesophageal junction adenocarcinoma.** *PLoS One* 2013, **8**:e62986.
- 741 51. Bruning A, Juckstock J, Blankenstein T, Makovitzky J, Kunze S, Mylonas I: **The**  
742 **metastasis-associated gene MTA3 is downregulated in advanced**  
743 **endometrioid adenocarcinomas.** *Histol Histopathol* 2010, **25**:1447-1456.
- 744 52. Huang Y, Li Y, He F, Wang S, Li Y, Ji G, Liu X, Zhao Q, Li J: **Metastasis-**  
745 **associated protein 3 in colorectal cancer determines tumor recurrence**  
746 **and prognosis.** *Oncotarget* 2017, **8**:37164-37171.
- 747 53. Jiao T, Li Y, Gao T, Zhang Y, Feng M, Liu M, Zhou H, Sun M: **MTA3 regulates**  
748 **malignant progression of colorectal cancer through Wnt signaling**  
749 **pathway.** *Tumour Biol* 2017, **39**:1010428317695027.
- 750 54. Li H, Sun L, Xu Y, Li Z, Luo W, Tang Z, Qiu X, Wang E: **Overexpression of**  
751 **MTA3 Correlates with Tumor Progression in Non-Small Cell Lung**  
752 **Cancer.** *PLoS One* 2013, **8**:e66679.
- 753 55. Okugawa Y, Mohri Y, Tanaka K, Kawamura M, Saigusa S, Toiyama Y, Ohi M,  
754 Inoue Y, Miki C, Kusunoki M: **Metastasis-associated protein is a predictive**  
755 **biomarker for metastasis and recurrence in gastric cancer.** *Oncol Rep*  
756 2016, **36**:1893-1900.
- 757 56. Wang C, Li G, Li J, Li J, Li T, Yu J, Qin C: **Overexpression of the metastasis-**  
758 **associated gene MTA3 correlates with tumor progression and poor**  
759 **prognosis in hepatocellular carcinoma.** *J Gastroenterol Hepatol* 2017,  
760 **32**:1525-1529.
- 761 57. Zhao J, Liang Q, Cheung KF, Kang W, Lung RW, Tong JH, To KF, Sung JJ, Yu J:  
762 **Genome-wide identification of Epstein-Barr virus-driven promoter**  
763 **methylation profiles of human genes in gastric cancer cells.** *Cancer* 2013,  
764 **119**:304-312.
- 765 58. Yu J, Liang Q, Wang J, Wang K, Gao J, Zhang J, Zeng Y, Chiu PW, Ng EK, Sung JJ:  
766 **REC8 functions as a tumor suppressor and is epigenetically**  
767 **downregulated in gastric cancer, especially in EBV-positive subtype.**  
768 *Oncogene* 2017, **36**:182-193.
- 769 59. Okamoto Y, Sawaki A, Ito S, Nishida T, Takahashi T, Toyota M, Suzuki H,  
770 Shinomura Y, Takeuchi I, Shinjo K, et al: **Aberrant DNA methylation**  
771 **associated with aggressiveness of gastrointestinal stromal tumour.** *Gut*  
772 2012, **61**:392-401.
- 773 60. Liu D, Shen X, Zhu G, Xing M: **REC8 is a novel tumor suppressor gene**  
774 **epigenetically robustly targeted by the PI3K pathway in thyroid cancer.**  
775 *Oncotarget* 2015, **6**:39211-39224.
- 776 61. Rapetti-Mauss R, Bustos V, Thomas W, McBryan J, Harvey H, Lajczak N,  
777 Madden SF, Pellissier B, Borgese F, Soriani O, Harvey BJ: **Bidirectional**  
778 **KCNQ1:beta-catenin interaction drives colorectal cancer cell**  
779 **differentiation.** *Proc Natl Acad Sci U S A* 2017, **114**:4159-4164.
- 780 62. Fan H, Zhang M, Liu W: **Hypermethylated KCNQ1 acts as a tumor**  
781 **suppressor in hepatocellular carcinoma.** *Biochem Biophys Res Commun*  
782 2018, **503**:3100-3107.

- 783 63. den Uil SH, Coupe VM, Linnekamp JF, van den Broek E, Goos JA, Delis-van  
784 Diemen PM, Belt EJ, van Grieken NC, Scott PM, Vermeulen L, et al: **Loss of**  
785 **KCNQ1 expression in stage II and stage III colon cancer is a strong**  
786 **prognostic factor for disease recurrence.** *Br J Cancer* 2016, **115**:1565-  
787 1574.
- 788 64. Arai E, Chiku S, Mori T, Gotoh M, Nakagawa T, Fujimoto H, Kanai Y: **Single-**  
789 **CpG-resolution methylome analysis identifies clinicopathologically**  
790 **aggressive CpG island methylator phenotype clear cell renal cell**  
791 **carcinomas.** *Carcinogenesis* 2012, **33**:1487-1493.
- 792 65. Xu K, Liu B, Ma Y, Xu B, Xing X: **A novel SWIM domain protein ZSWIM5**  
793 **inhibits the malignant progression of non-small-cell lung cancer.** *Cancer*  
794 *Manag Res* 2018, **10**:3245-3254.
- 795 66. Xu K, Liu P, Wei W: **mTOR signaling in tumorigenesis.** *Biochim Biophys*  
796 *Acta* 2014, **1846**:638-654.
- 797 67. Gomez S, Garrido-Garcia A, Garcia-Gerique L, Lemos I, Sunol M, de Torres C,  
798 Kulis M, Perez-Jaume S, Carcaboso AM, Luu B, et al: **A Novel Method for**  
799 **Rapid Molecular Subgrouping of Medulloblastoma.** *Clin Cancer Res* 2018,  
800 **24**:1355-1363.
- 801 68. Tang Q, Holland-Letz T, Slynko A, Cuk K, Marme F, Schott S, Heil J, Qu B,  
802 Golatta M, Bewerunge-Hudler M, et al: **DNA methylation array analysis**  
803 **identifies breast cancer associated RPTOR, MGRN1 and RAPSN**  
804 **hypomethylation in peripheral blood DNA.** *Oncotarget* 2016, **7**:64191-  
805 64202.
- 806 69. Dugue PA, Milne RL, Southey MC: **A prospective study of peripheral blood**  
807 **DNA methylation at RPTOR, MGRN1 and RAPSN and risk of breast**  
808 **cancer.** *Breast Cancer Res Treat* 2017, **161**:181-183.  
809

810

811

812

813

814

815

816 **Figure titles and legends:**

817 **Figure 1. Longitudinal plots for DNA methylation-based estimates**

818 The line plots (left) show the individual trajectory over time and the box plots  
819 (right) show the data averaged by visit year (baseline = 1, and Year 6) in cancer-  
820 free (no) or cancer-present (yes) groups. **(A)** Estimated proportions of CD8+ T-  
821 cells show a significant decline over time (baseline vs Year 6, solid line above  
822 boxplots) and are lower in the cancer-present group relative to the cancer-free  
823 group at Year 6 (cancer-free vs cancer-present, dashed line above boxplots). **(B)**  
824 Granulocyte proportions generally increase over time and are higher in the  
825 cancer-present group by Year 6. **(C)** The first principal component (PC1)  
826 computed from genome-wide methylation shows significant change over time as  
827 well as significant cross-sectional difference between the cancer-free and  
828 cancer-present groups by Year 6. In the line plots, red lines identify individuals  
829 who received a cancer diagnosis, and black lines identify those who remained  
830 cancer-free. Significance codes are \* p-value < 0.05, \*\* p-value < 0.01.

831 **Figure 2: Epigenome-wide association plot**

832 The Manhattan plot shows the association between the CpGs and cancer at Year  
833 6. The x-axis represents the chromosomal locations, and each point depicts a  
834 CpG probe. The y-axis is the  $-\log_{10}(\text{p-value})$  of differential methylation between  
835 those who received cancer diagnosis vs. those who remained cancer-free. The  
836 red horizontal line indicates the genome-wide significant threshold (p-value  $\leq 5 \times$

837  $10^{-8}$ ) and the blue horizontal line indicates the suggestive threshold ( $p$ -value  $\leq 10^{-5}$ ).  
838

### 839 **Figure 3: Longitudinal rate of change in CpG methylation**

840 The line plots (left) show the individual DNA methylation  $\beta$ -values from baseline  
841 to Year 6 for CpGs in **(A)** *REC8* (cg07516252), **(B)** *RPTOR* (cg08129331), and  
842 **(C)** *ZSWIM5* (cg04429789). Red lines identify individuals who received a cancer  
843 diagnosis, and black lines identify those who remained cancer-free. Longitudinal  
844 changes in DNA methylation were calculated as  $\Delta\beta = \text{Year 6} - \text{baseline}$ , and  
845 the correlations between  $\Delta\beta$  and years to cancer diagnosis are shown for the  
846 respective CpGs (right). Higher magnitude of change is seen in individuals closer  
847 to clinical diagnosis.

### 848 **List and description of additional files:**

#### 849 **Additional file 1: Figure S1. Microarray data quality checks**

850 **(A)** The density plots for  $\beta$ -values using the full set of 866,836 probes show the  
851 expected bimodal distribution. **(B)** Unsupervised hierarchical clustering using the  
852 full set of probes shows that, with the exception of two participants (Per1 and  
853 Per9), all samples with longitudinal data pair appropriately with self. This cluster  
854 tree identifies Per13 as an outlier at both baseline and visit year 6. **(C)** Principal  
855 component analysis was done using a filtered set of 739,648 autosomal probes.  
856 The scatter plot between principal component 1 (PC1) and PC2 identifies Per13  
857 as an outlier.

858 **Additional file 2: Figures S2. Samples pair by participant ID.**

859 Unsupervised hierarchical clustering using probes that were flagged due to  
860 overlap with SNPs shows that samples collected longitudinally from the same  
861 participant pair perfectly.

862 **Additional file 3: Table S1. DNA methylation-based estimation of blood cell**  
863 **proportions**

864 **Additional file 4: Data S1. Analysis of top 5 principal components and**  
865 **association with demographics, blood cell estimates, and cancer diagnosis**

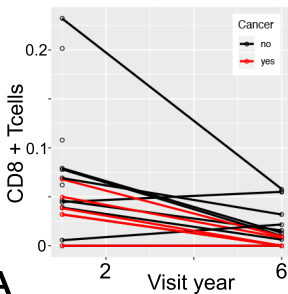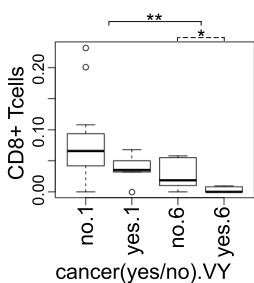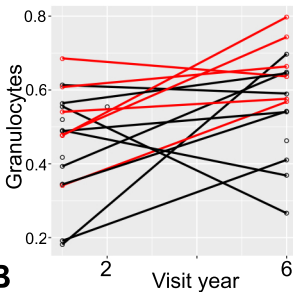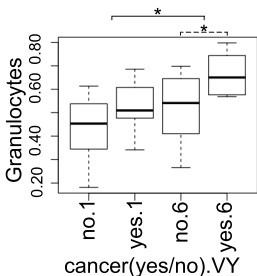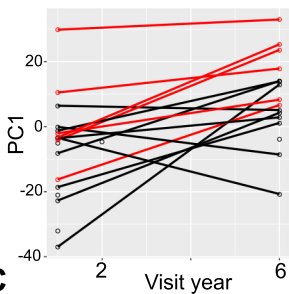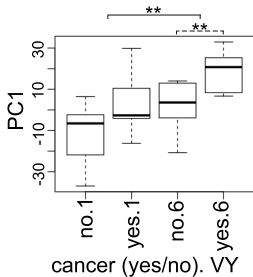

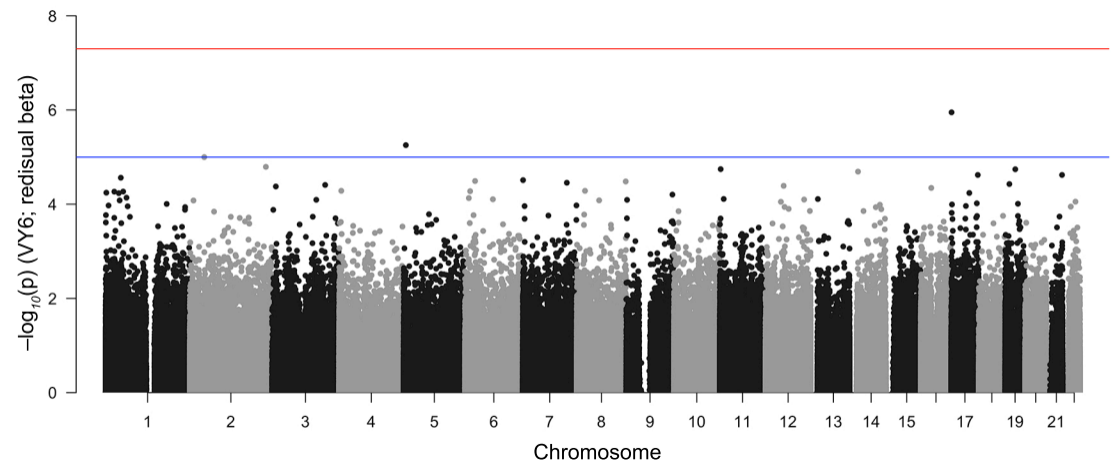

**A**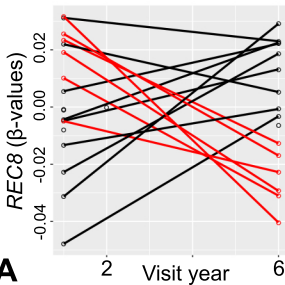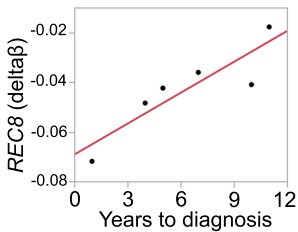**B**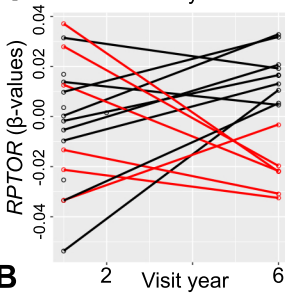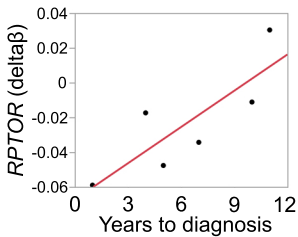**C**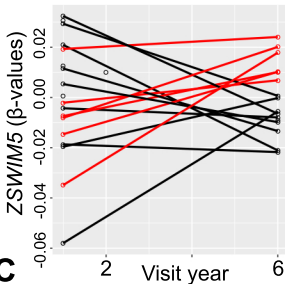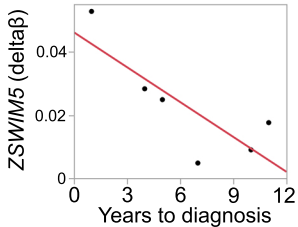

Source: https://www.biorxiv.org/content/10.1101/597666v1.full.pdf
